# Supplementary material
Source: Springer Nature journal article supplement (https://www.springermedizin.de/resource/supplementary/12891_2010_1165_MOESM6_ESM.pdf/9507214)

| Study or Subgroup | Std. Mean Difference<br>IV, Random, 95% CI |
|-------------------|--------------------------------------------|
|-------------------|--------------------------------------------|

|               |                     |
|---------------|---------------------|
| Eversden 2007 | -0.18 [-0.61, 0.26] |
| Foley 2003    | 0.60 [0.12, 1.08]   |
| Fransen 2007  | -0.18 [-0.55, 0.19] |
| Lund 2008     | -0.06 [-0.61, 0.48] |
| Silva 2008    | 0.39 [-0.10, 0.89]  |

**Total (95% CI)**                      **0.19 [-0.19, 0.56]**

Heterogeneity:  $\tau^2 = 0.08$ ;  $\text{Chi}^2 = 7.04$ ,  $\text{df} = 3$  ( $P = 0.07$ );  $I^2 = 57\%$

Test for overall effect:  $Z = 0.98$  ( $P = 0.33$ )

| Std. Mean Difference<br>IV, Random, 95% CI |
|--------------------------------------------|
|--------------------------------------------|

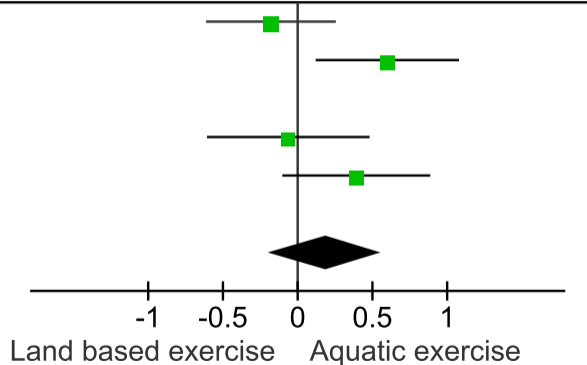

Supplement: MOESM6 [file 9507214]
